# Supplementary material for: Genotyping and Antimicrobial Susceptibility Profiling of Streptococcus uberis Isolated from a Clinical Bovine Mastitis Outbreak in a Dairy Farm
Source: MDPI journal article supplement (doi:10.3390/antibiotics10060644), 2021-05-28
Supplement: s1 [file s1]

**Table S1.** Descriptive statistics of MIC values for the 14 antimicrobial agents and comparison of their distribution in the two genotypic clusters.

|                            |                               | Report               |        |        |                    |        |        |        |        |        |         |        |        |        |         |
|----------------------------|-------------------------------|----------------------|--------|--------|--------------------|--------|--------|--------|--------|--------|---------|--------|--------|--------|---------|
| <i>Cluster</i>             |                               | AMC                  | AMP    | CEZ    | CEF                | CPZ    | CEQ    | ENRO   | ERY    | FLL    | LIN     | OXA    | PEN    | T/S    | TET     |
| <i>I</i>                   | <b>Mean</b>                   | 0.2308               | 0.2296 | 0.8221 | 0.9327             | 1.5577 | 0.4976 | 0.5649 | 0.4976 | 1.9808 | 13.2885 | 2.0192 | 0.5986 | 0.1409 | 24.8750 |
|                            | <b>SD</b>                     | 0.1222               | 0.2584 | 2.1496 | 2.1545             | 2.1251 | 2.1933 | 0.6020 | 2.2112 | 0.6101 | 5.3112  | 0.9598 | 2.4355 | 0.5500 | 12.3674 |
|                            | <b>SE</b>                     | 0.0170               | 0.0358 | 0.2981 | 0.2988             | 0.2947 | 0.3041 | 0.0835 | 0.3066 | 0.0846 | 0.7365  | 0.1331 | 0.3377 | 0.0763 | 1.7150  |
| <i>II</i>                  | <b>Mean</b>                   | 0.1801               | 0.1783 | 0.5368 | 0.4007             | 1.3015 | 0.1765 | 0.4706 | 1.0588 | 1.8235 | 14.4706 | 1.7721 | 0.1287 | 0.0515 | 23.5588 |
|                            | <b>SD</b>                     | 0.0695               | 0.0731 | 0.1965 | 0.2109             | 0.5712 | 0.0994 | 0.0830 | 3.8503 | 0.7276 | 4.3318  | 0.8152 | 0.0347 | 0.0246 | 11.4149 |
|                            | <b>SE</b>                     | 0.0168               | 0.0177 | 0.0477 | 0.0511             | 0.1385 | 0.0241 | 0.0201 | 0.9338 | 0.1765 | 1.0506  | 0.1977 | 0.0084 | 0.0060 | 2.7685  |
|                            |                               | Statistical Analysis |        |        |                    |        |        |        |        |        |         |        |        |        |         |
|                            |                               | AMC                  | AMP    | CEZ    | CEF                | CPZ    | CEQ    | ENRO   | ERY    | FLL    | LIN     | OXA    | PEN    | T/S    | TET     |
| <b>Mann-Whitney U test</b> |                               | 316                  | 384    | 442    | 231.5              | 420    | 350.5  | 385    | 427.5  | 376    | 401.5   | 378    | 377    | 406.5  | 396     |
| <b>Wilcoxon W test</b>     |                               | 469                  | 537    | 595    | 384.5              | 1798   | 503.5  | 1763   | 580.5  | 529    | 1779.5  | 531    | 530    | 559.5  | 549     |
| <b>Z</b>                   |                               | −2.112               | −0.919 | 0.000  | −3.265             | −0.370 | −1.450 | −0.925 | −0.413 | −1.249 | −0.828  | −1.240 | −1.291 | −0.536 | −0.789  |
| <b><i>p</i> value *</b>    |                               | 0.034 <sup>a</sup>   | 0.336  | 1.000  | 0.001 <sup>a</sup> | 0.731  | 0.141  | 0.351  | 0.979  | 0.180  | 0.445   | 0.227  | 0.243  | 0.605  | 0.435   |
| <b>99% CI</b>              |                               |                      |        |        |                    |        |        |        |        |        |         |        |        |        |         |
|                            | <i>Lower confidence limit</i> | 0.029                | 0.324  | 1.000  | 0.000              | 0.720  | 0.132  | 0.338  | 0.975  | 0.170  | 0.432   | 0.216  | 0.232  | 0.592  | 0.423   |
|                            | <i>Upper confidence limit</i> | 0.039                | 0.348  | 1.000  | 0.002              | 0.743  | 0.150  | 0.363  | 0.982  | 0.189  | 0.457   | 0.237  | 0.254  | 0.617  | 0.448   |

\* Monte Carlo approximation two tailed. <sup>a</sup> Significance level ( $p < 0.05$ )
